# Supplementary material
Source: Springer Nature journal article supplement (https://www.springermedizin.de/resource/supplementary/12876_2013_1092_MOESM2_ESM.pdf/9438428)

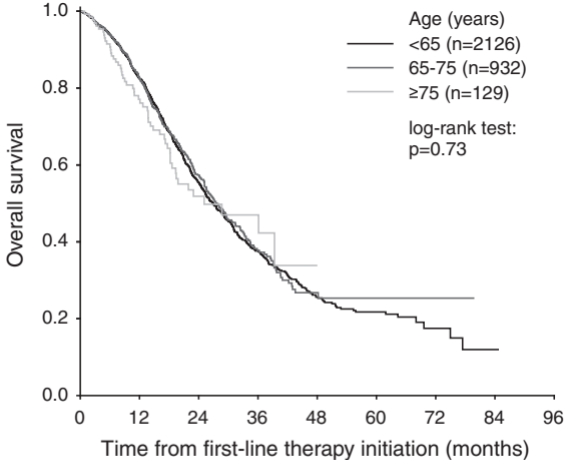

n at risk

|               |      |     |     |    |    |   |   |   |
|---------------|------|-----|-----|----|----|---|---|---|
| Age <65 years | 1441 | 632 | 270 | 96 | 41 | 8 | 1 | 0 |
|---------------|------|-----|-----|----|----|---|---|---|

|                 |     |     |    |    |   |   |   |   |
|-----------------|-----|-----|----|----|---|---|---|---|
| Age 65-75 years | 640 | 254 | 79 | 19 | 4 | 2 | 0 | 0 |
|-----------------|-----|-----|----|----|---|---|---|---|

|               |    |    |    |   |   |   |   |   |
|---------------|----|----|----|---|---|---|---|---|
| Age ≥75 years | 79 | 30 | 11 | 0 | 0 | 0 | 0 | 0 |
|---------------|----|----|----|---|---|---|---|---|

Supplement: MOESM2 [file 9438428]
